# Supplementary material for: Pseudomonas donghuensis HYS gtrA/B/II Gene Cluster Contributes to Its Pathogenicity toward Caenorhabditis elegans
Source: MDPI journal article supplement (doi:10.3390/ijms221910741), 2021-10-04
Supplement: s1 [file s1]

# Supplementary Materials

Yaqian Xiao<sup>1</sup>, Panning Wang<sup>1</sup>, Xuesi Zhu<sup>1</sup>, Zhixiong Xie<sup>1\*</sup>

<sup>1</sup> Hubei Key Laboratory of Cell Homeostasis, College of Life Sciences, Wuhan University, Wuhan 430072, China

\* Correspondence: [zxjie@whu.edu.cn](mailto:zxjie@whu.edu.cn)

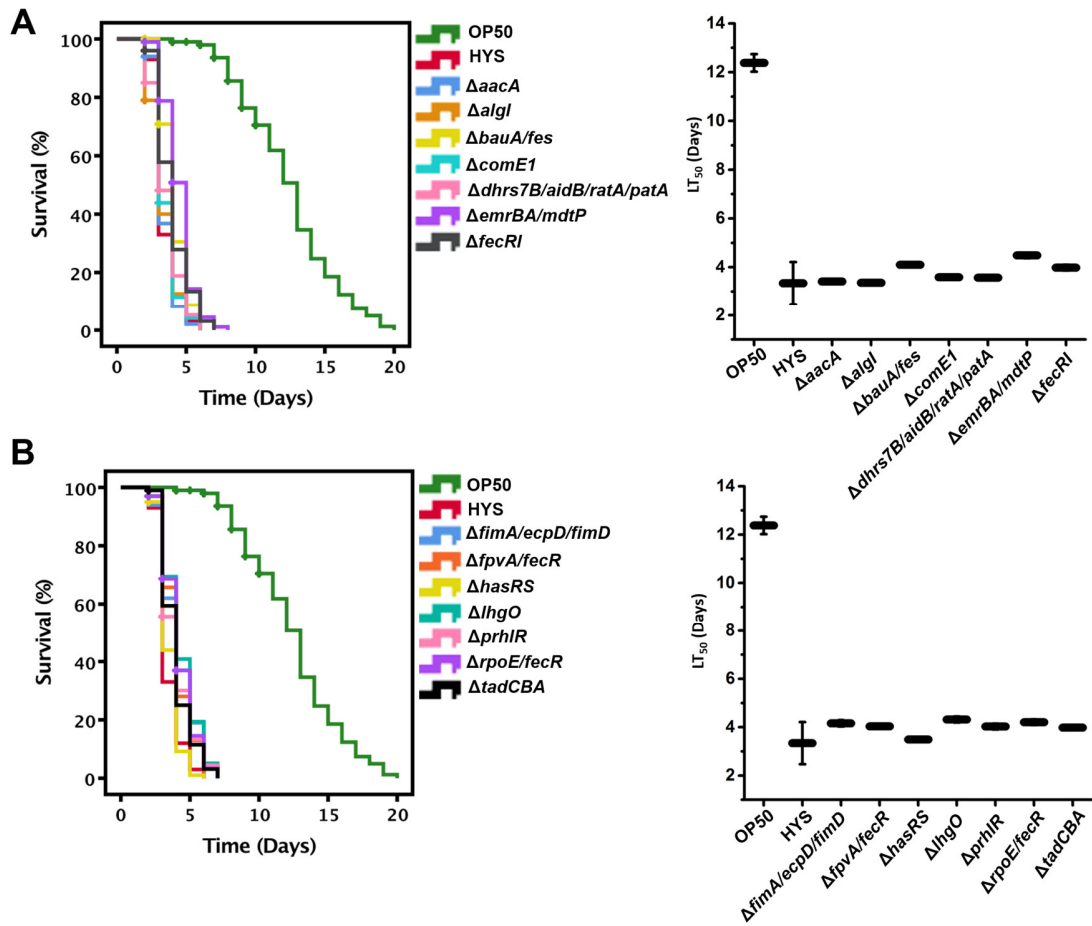

**Figure S1.** The functions of specific virulence genes were assessed by slow-killing experiments. (A,B) other knockout strains without significant virulence reduction were listed.  $\Delta$ mymA/mbtJ/alkK and  $\Delta$ wzzB/rfbC/gnaT/fdtB/wzxE/asnB have obvious growth defects, they cannot be used in the slow-killing experiments of the effect of gene virulence function loss on the life span of *C. elegans*, so they are not listed. Data are presented as the mean  $\pm$  standard deviation from three independent experiments.

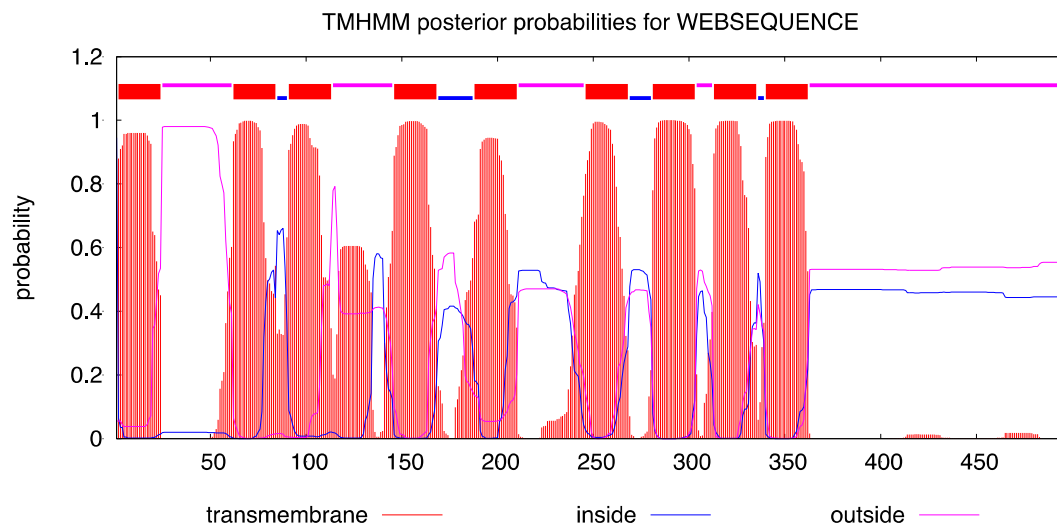

**Figure S2.** Hydropathy analysis of GtrII was determined using the computer program TMHMM. Red regions indicate hypothetical transmembranes with the probability for each entered on the Y axis. Extracellular and intracellular domains are indicated in pink and red, respectively.

|                                 |                                                                                   |     |
|---------------------------------|-----------------------------------------------------------------------------------|-----|
| <i>P. donghuensis</i> HYS GtrII | .....VLLFFVLSFVYFEPVRADYAYVDDNWRALLQADARNQGRILIEGLYRALTFSEATINI                   | 62  |
| <i>S. flexneri</i> GtrI         | MSICIKQSALKILLALSALLITWLTTRYFPEPDVANSFIVWRHILENGISSIHDKPTVDNWYFTWVPINFLFYMLLGD    | 80  |
| <i>S. flexneri</i> 2a GtrII     | .....MIKINLFKNANLIAFISCFATSIYCYWGTLYDGTNLIDGCTNNFYQTITLGR                         | 53  |
| <i>S. flexneri</i> 3a GtrX      | .....MKIFIMRNWHKISIFILAFTLIWLRRDILTNAQF.WAEDAVFVWKDAYEQGFSSSLITPR                 | 60  |
| <i>S. flexneri</i> 5a GtrV      | .....MKS LKTSYVKKLFFLAVFVFIIVILMYLRRPDITRTPCF.WADGHVWYAMAYNNGIFTSMIFFQ            | 64  |
| <i>P. donghuensis</i> HYS GtrII | FPLPLLISVFALALAMARLTFWLFRPGITSCLVILPVLGNFFELG.NLTYQYDGPGMVIALVAVICAITCRIERRSVR.   | 140 |
| <i>S. flexneri</i> GtrI         | DELVALRLSTAVFSIAIVIAAMITLRKAFGFTPALFSIILSLIPYFSYTYGFVSHFSSHNSTNAFGFLCLLISVFNIIQY  | 160 |
| <i>S. flexneri</i> 2a GtrII     | ...WFHTFLRHYFLPEPFS..LWITPLIALSFIIISAFIICRSIKLESYE.LLIGMLVITFPQISYQLEFLNQADITVG   | 126 |
| <i>S. flexneri</i> 3a GtrX      | NG..YFQIVSTILVIGATTFINPIYAPLLSNFFGIIIRAIIIWLELTDRFKE.LSTTSKIFISVYLICMPGLDEVQANITN | 137 |
| <i>S. flexneri</i> 5a GtrV      | NG..YYQTIISKLIASISLNFNLMYAPLIFNISATIVRALLVSEILSGRFSY.VNITPRIITALFIIIMPEVSEVHANVTN | 141 |
| <i>P. donghuensis</i> HYS GtrII | .GLLAALLIIVALSLEYQLTISLFIIGLCIVEYVRGVKDKVAVQALLVTLVERVQLIVGGIYFFTAYQLAIDTRGNPEFF  | 219 |
| <i>S. flexneri</i> GtrI         | KNIFITILLSLTALFSSVSDFWPTAAFFIPILISYF...LFSVDKKLKFHTALILFACILISLNVQLNLLNIPPHQFEI   | 237 |
| <i>S. flexneri</i> 2a GtrII     | IAFLLAISIIIFHSQKNRIVIFSG.IVLSLSMA...IYQTFVYIIAFVIGLQINSIRNEKNIRESFYSSCLSLSL       | 201 |
| <i>S. flexneri</i> 3a GtrX      | AHWYLSIYVAMIISSESKSKLKAHDLFFVLSG...LSGFFIIFIIASSV.FKYLHISKGVISIRG.LYLFYTRIPY      | 211 |
| <i>S. flexneri</i> 5a GtrV      | DHWYLSIYLLVMLAPKPTNNYQKHDYIAIICG...LSGFFIVFMAFMVG.INILIQKR..LSTK....KITTHEY       | 209 |
| <i>P. donghuensis</i> HYS GtrII | DQQWFEEVWVKFQSMQMLGILTASAGVAVALLGASAGFVLLMSNIPQMQRSLSGKLGVALLYLLGLVIVVCSVPGM      | 299 |
| <i>S. flexneri</i> GtrI         | VSLNDMILNAKWCLLIGKSNLL.VVDNNATSYSFVWIFIAIITSAWFVLSDNKNNTYRIYIVFSLLSIAGIVSSFI      | 316 |
| <i>S. flexneri</i> 2a GtrII     | IALSTLIYLLTKATKHYFSIESN.EYISNYIQNSDIKWLVKSAIDNIYNFYNNPFTGLNLYKWLLIPLILIMFTLIYK    | 280 |
| <i>S. flexneri</i> 3a GtrX      | LAMILCGLIATSTILTFNGTRSH.APILG..FSFDVMSIISSNVFLFSFVPWNIADAGWD.NHLLSYTLSTLITLVCVF   | 287 |
| <i>S. flexneri</i> 5a GtrV      | VFAIC.FIGFISIMTSSETRVD.MALG..ANFTLCKILTCKVFLGLWANGDFLSPLWN.HDSICIAITMICLSITIF     | 284 |
| <i>P. donghuensis</i> HYS GtrII | MLFVAEPNLEARNIGFAANLVILFF....LNHELFGRVWGLRWLLIMPTLFMAFSYAYGVIIAKKELASAMAHYI       | 374 |
| <i>S. flexneri</i> GtrI         | LSYKSPDYISMRFEMNVCFAIILCC....IGTSTKAKILFYLIAFLFS..ISSIKSYTNNASPLHDQEKIVKSYIDFL    | 389 |
| <i>S. flexneri</i> 2a GtrII     | IKTRSIYLISSIIIIYILPFIIVVVGSGAPERFVLMPIVIVILFSCLSN.FRSTKYLNCMFFLFIIFNGVSTSKNLF     | 359 |
| <i>S. flexneri</i> 3a GtrX      | LYIKGNWQMKVFATLPIILIVAFSMAK....PQLADSPQLPILATGNGRYFVNIIHIAIFSLICVCLFQCCKNKTLLKIF  | 362 |
| <i>S. flexneri</i> 5a GtrV      | TFIVSNYPMRSIVFAIITITFSLAK....EMISSTSEQWLLIHGGGR..YSVIFTIIVSVLVYFLNYSHLHFFEL       | 357 |
| <i>P. donghuensis</i> HYS GtrII | ANDIVSRSEIRSVIKYYYLRAFGGNNLFRGHGAMTQMPLLR.YIISGNSVSLHACFFELGINN.VIGGEHSVFAQLAA    | 452 |
| <i>S. flexneri</i> GtrI         | KKNLHYGYGCFWDLSTMVNWISGGDIQ..ITPVFFNADSGK.INITGVRQQTILASWHSKEAFN..SAPERQFIAVSAN   | 464 |
| <i>S. flexneri</i> 2a GtrII     | NDTLARQKDISLAKEISYTSQTKGISLNGKYIYIYGNSDSGNMLMSADTFGKSFWWDGGNYFRMVAFMNYYGICNCKP    | 439 |
| <i>S. flexneri</i> 3a GtrX      | FKIYVSVILVMIKLNFFITPLPDMWS.QGAELINKAKHGEAVSTAVLPFWLTLDLIK.....                    | 421 |
| <i>S. flexneri</i> 5a GtrV      | PWMYTTSLISCLYF.FNLTLPLPYGWR.EQVKKFESLAPGESYSKFNFPAGWMTLIRKQP.....                 | 417 |
| <i>P. donghuensis</i> HYS GtrII | SGRVGAPLVDRFYSIYVAGACGFIVMKEFIQEDENYNQHWPVAVP..                                   | 496 |
| <i>S. flexneri</i> GtrI         | EPERCKEMTSLAGIQEQLGKPFDEVLFNFEGRVILVFNKKLNL....                                   | 506 |
| <i>S. flexneri</i> 2a GtrII     | ANKEQIEKIYPIVKSLSFSPNPNPDSIAEINGLVIIKLSKCKGWLPFN                                  | 485 |
| <i>S. flexneri</i> 3a GtrX      | .....                                                                             | 421 |
| <i>S. flexneri</i> 5a GtrV      | .....                                                                             | 417 |

**Figure S3.** Sequence alignment of Gtr<sub>[type]</sub> proteins and highlight the selected residues. Protein sequences for alignment are as follows: *P. donghuensis* HYS GtrII (WP\_081492764.1), *S. flexneri* GtrI (AAF09027.1), *S. flexneri* 2a GtrII (ARS43275.1), *S. flexneri* 3a GtrX (ARS43311.1) and *S. flexneri* 5a GtrV (EID60858.1). The red square indicates the critical residues in this study, each residue was converted into alanine by point mutation. The red circle means that conserved residues have been identified in *Shigella flexneri*. The number represents the position of the residue in the sequence.

**Table S1.** The specific virulence genes of *P. donghuensis* HYS compare to the other six strains

| Gene ID       | Name         | Identity<br>(VFDB) | Description                                       |
|---------------|--------------|--------------------|---------------------------------------------------|
| UW3_RS0105435 | <i>fha1</i>  | 72.38              | hypothetical protein                              |
| UW3_RS0117890 | <i>fdtB</i>  | 71.35              | hypothetical protein                              |
| UW3_RS26700   | <i>fpvA</i>  | 68.02              | ferrichrome-iron receptor                         |
| UW3_RS0104075 | <i>gtrA</i>  | 42.37              | bactoprenol-linked glucose translocase            |
| UW3_RS0104080 | <i>gtrB</i>  | 62.58              | bactoprenol glucosyl transferase                  |
| UW3_RS0109785 | <i>pilT</i>  | 61.65              | twitching motility protein                        |
| UW3_RS0120465 | <i>mymA</i>  | 61.36              | putative monooxygenase                            |
| UW3_RS0105460 | <i>impM</i>  | 60.75              | hypothetical protein                              |
| UW3_RS0105440 | <i>vasD</i>  | 56.97              | lipoprotein, putative                             |
| UW3_RS0125350 | <i>fpvA</i>  | 56.92              | outer membrane ferripyoverdine receptor           |
| UW3_RS0114930 | <i>lhgO</i>  | 55.47              | hypothetical protein                              |
| UW3_RS0117895 | <i>ganT</i>  | 54.37              | hypothetical protein                              |
| UW3_RS0124175 | <i>hasS</i>  | 53.55              | sigma factor regulatory protein FecR/PupR family  |
| UW3_RS0117885 | <i>wzxE</i>  | 53.55              | AraC-type DNA-binding domain-containing protein   |
| UW3_RS0117865 | <i>asnB</i>  | 50.85              | ORF_10; similar to Asparagine synthase            |
| UW3_RS0124165 | <i>hasR</i>  | 50.17              | heme transport protein                            |
| UW3_RS0118700 | <i>hmuU</i>  | 49.68              | hemin transport system permease HmuU              |
| UW3_RS0123355 | <i>tadA</i>  | 48.87              | type II/IV secretion system ATP hydrolase TadA    |
| UW3_RS0102635 | <i>irgA</i>  | 48.64              | enterobactin receptor                             |
| UW3_RS0108425 | <i>hemN</i>  | 48.05              | oxygen-independent coproporphyrinogen III oxidase |
| UW3_RS0108420 | <i>hemN</i>  | 42.93              | oxygen-independent coproporphyrinogen III oxidase |
| UW3_RS0121460 | <i>prhI</i>  | 47.44              | RNA polymerase sigma factor                       |
| UW3_RS0121345 | <i>emrA</i>  | 47.17              | efflux pump protein, fatty acid resistance        |
| UW3_RS27845   | <i>pilM</i>  | 47.06              | type IV pili biogenesis protein PilM              |
| UW3_RS0108265 | <i>algI</i>  | 46.84              | membrane bound O-acyl transferase                 |
| UW3_RS0108825 | <i>fecI</i>  | 46.39              | heme uptake regulator                             |
| UW3_RS0117820 | <i>comE1</i> | 45.9               | hypothetical protein                              |
| UW3_RS0111045 | <i>aacA</i>  | 45.75              | isochorismatase family protein                    |
| UW3_RS0117905 | <i>rmlC</i>  | 45.57              | dTDP-6-deoxy-D-xylo-4-hexulose-3,5-epimerase      |
| UW3_RS0121340 | <i>emrB</i>  | 45.45              | multidrug resistance translocase                  |
| UW3_RS0113110 | <i>fpvA</i>  | 44.91              | TonB-dependent siderophore receptor               |
| UW3_RS0110865 | <i>pupA</i>  | 44.35              | Ferric-pseudobactin 358 receptor                  |
| UW3_RS0117915 | <i>wzzB</i>  | 43.81              | Wzz [LPS O-antigen ( <i>P. aeruginosa</i> )       |
| UW3_RS27490   | <i>pilR</i>  | 43.6               | putative two-component system, response regulator |
| UW3_RS0103765 | <i>bauA</i>  | 42.88              | TonB-dependent siderophore receptor BauA          |
| UW3_RS0121360 | <i>pvcC</i>  | 42.36              | paerucumarin biosynthesis protein PvcC            |

| Gene ID       | Name        | Identity<br>(VFDB) | Description                            |
|---------------|-------------|--------------------|----------------------------------------|
| UW3_RS27290   | <i>hmuV</i> | 42.17              | Hemin import ATP-binding protein HmuV  |
| UW3_RS26865   | <i>bvgS</i> | 41.9               | virulence sensor protein               |
| UW3_RS0115940 | <i>pvcA</i> | 41.67              | paerucumarin biosynthesis protein PvcA |
| UW3_RS0122980 | <i>fimD</i> | 41.4               | outer membrane usher protein           |
| UW3_RS0122975 | <i>ecpD</i> | 41.36              | putative chaperone protein EcpD        |
| UW3_RS0116405 | <i>rpoE</i> | 40.72              | RNA polymerase sigma-70 factor         |

**Table S2.** Mutants of 42 specific virulence genes and their adjacent genes used in this study

| Strains | Description                    | Gene ID                                                          | Name                                                       | Source     |
|---------|--------------------------------|------------------------------------------------------------------|------------------------------------------------------------|------------|
| HYS1    | $\Delta aacA$                  | UW3_RS0111045                                                    | <i>aacA</i>                                                | This study |
| HYS2    | $\Delta algI$                  | UW3_RS0108265                                                    | <i>algI</i>                                                | This study |
| HYS3    | $\Delta bauA/fes$              | UW3_RS0103765<br>UW3_RS0103770                                   | <i>bauA</i><br><i>fes</i>                                  | This study |
| HYS4    | $\Delta comE1$                 | UW3_RS0117820                                                    | <i>comE1</i>                                               | This study |
| HYS5    | $\Delta dhrs7B/aidB/ratA/patA$ | UW3_RS0118235<br>UW3_RS0118230<br>UW3_RS0118225<br>UW3_RS0118220 | <i>dhrs7B</i><br><i>aidB</i><br><i>ratA</i><br><i>patA</i> | This study |
| HYS6    | $\Delta emrBA/mdtP$            | UW3_RS0121340<br>UW3_RS0121345<br>UW3_RS27465                    | <i>emrB</i><br><i>emrA</i><br><i>mdtP</i>                  | This study |
| HYS7    | $\Delta fecRI$                 | UW3_RS0108830<br>UW3_RS0108825                                   | <i>fecR</i><br><i>fecI</i>                                 | This study |
| HYS8    | $\Delta fimA/ecpD/fimD$        | UW3_RS0122970<br>UW3_RS0122975<br>UW3_RS0122980                  | <i>fimA</i><br><i>ecpD</i><br><i>fimD</i>                  | This study |
| HYS9    | $\Delta fpvA/fecR$             | UW3_RS0125350<br>UW3_RS0125355                                   | <i>fpvA</i><br><i>fecR</i>                                 | This study |
| HYS10   | $\Delta gtrAB$                 | UW3_RS0104075<br>UW3_RS0104080                                   | <i>gtrA</i><br><i>gtrB</i>                                 | This study |
| HYS11   | $\Delta hasRS$                 | UW3_RS0124165<br>UW3_RS0124175                                   | <i>hasR</i><br><i>hasS</i>                                 | This study |
| HYS12   | $\Delta hemN/hemN$             | UW3_RS0108425<br>UW3_RS0108420                                   | <i>hemN</i><br><i>hemN</i>                                 | This study |
| HYS13   | $\Delta hurR/hmuVUTS$          | UW3_RS0118690<br>UW3_RS27290<br>UW3_RS0118700                    | <i>hurR</i><br><i>hmuV</i><br><i>hmuU</i>                  | This study |

| Strains | Description                                  | Gene ID       | Name        | Source     |
|---------|----------------------------------------------|---------------|-------------|------------|
|         |                                              | UW3_RS0118705 | <i>hmuT</i> |            |
|         |                                              | UW3_RS0118710 | <i>hmuS</i> |            |
| HYS14   | $\Delta irgA$                                | UW3_RS0102635 | <i>irgA</i> | This study |
| HYS15   | $\Delta lhgO$                                | UW3_RS0114930 | <i>lhgO</i> | This study |
|         |                                              | UW3_RS0120455 | <i>mbtJ</i> |            |
| HYS16   | $\Delta mymA/mbtJ/alkK$                      | UW3_RS0120460 | <i>alkK</i> | This study |
|         |                                              | UW3_RS0120465 | <i>mymA</i> |            |
|         |                                              | UW3_RS0121460 | <i>prhI</i> |            |
| HYS17   | $\Delta prhIR$                               | UW3_RS0121455 | <i>prhR</i> | This study |
|         |                                              | UW3_RS0116405 | <i>rpoE</i> |            |
| HYS18   | $\Delta rpoE/fecR$                           | UW3_RS0116400 | <i>fecR</i> | This study |
|         |                                              | UW3_RS0123365 | <i>tadC</i> |            |
| HYS19   | $\Delta tadCBA$                              | UW3_RS0123360 | <i>tadB</i> | This study |
|         |                                              | UW3_RS0123355 | <i>tadA</i> |            |
|         |                                              | UW3_RS0117915 | <i>wzzB</i> |            |
|         |                                              | UW3_RS0117905 | <i>rfbC</i> |            |
| HYS20   | $\Delta wzzB/rfbC/gnaT/$<br>$fdtB/wzxE/asnB$ | UW3_RS0117895 | <i>gnaT</i> | This study |
|         |                                              | UW3_RS0117890 | <i>fdtB</i> |            |
|         |                                              | UW3_RS0124175 | <i>wzxE</i> |            |
|         |                                              | UW3_RS0117865 | <i>asnB</i> |            |

**Table S3.** Bacterial strains and plasmids used in this study

| Strains and Plasmids                   | Description <sup>a</sup>                                                             | Source                                    |
|----------------------------------------|--------------------------------------------------------------------------------------|-------------------------------------------|
| <i>E. coli</i> strain                  |                                                                                      |                                           |
| S17-1 $\lambda$ pir                    | <i>thi pro hsdR recA</i> ; chromosomal RP4-2; (Tc::Mu) (Km::Tn7) Tpr Sp <sup>r</sup> | (Simon, Priefer et al. 1983) <sup>b</sup> |
| <i>Pseudomonas donghuensis</i> strains |                                                                                      |                                           |
| HYS                                    | Wild-type, lethal to <i>C. elegans</i> , Cm <sup>r</sup>                             | Preserved in laboratory                   |
| HYS21                                  | $\Delta gtrA$                                                                        | This study                                |
| HYS22                                  | $\Delta gtrB$                                                                        | This study                                |
| HYS23                                  | $\Delta gtrII$                                                                       | This study                                |
| HYS24                                  | $\Delta gtrAB$                                                                       | This study                                |
| HYS25                                  | $\Delta gtrABII$                                                                     | This study                                |
| HYS26                                  | $\Delta gtrA/pBBR1-MCS2$                                                             | This study                                |
| HYS27                                  | $\Delta gtrA/pBBR2-gtrA$                                                             | This study                                |
| HYS28                                  | $\Delta gtrB/pBBR1-MCS2$                                                             | This study                                |

| Strains and Plasmids        | Description <sup>a</sup>                                                                   | Source                                               |
|-----------------------------|--------------------------------------------------------------------------------------------|------------------------------------------------------|
| HYS29                       | $\Delta gtrB$ /pBBR2- <i>gtrB</i>                                                          | This study                                           |
| HYS30                       | $\Delta gtrII$ /pBBR1-MCS2                                                                 | This study                                           |
| HYS31                       | $\Delta gtrII$ /pBBR2- <i>gtrII</i>                                                        | This study                                           |
| HYS32                       | $\Delta gtrABII$ /pBBR1-MCS2                                                               | This study                                           |
| HYS33                       | $\Delta gtrABII$ /pBBR2- <i>gtrA</i>                                                       | This study                                           |
| HYS34                       | $\Delta gtrABII$ /pBBR2- <i>gtrB</i>                                                       | This study                                           |
| HYS35                       | $\Delta gtrABII$ /pBBR2- <i>gtrII</i>                                                      | This study                                           |
| HYS36                       | $\Delta gtrABII$ /pBBR2- <i>gtrABII</i>                                                    | This study                                           |
| HYS37                       | HYS/pBBR1-MCS2                                                                             | This study                                           |
| Plasmids                    |                                                                                            |                                                      |
| pEX18Gm                     | Gene replacement vector, Gm <sup>r</sup> <i>oriT</i> <sup>+</sup> <i>sacB</i> <sup>+</sup> | (Hoang, Karkhoff-Schweizer et al. 1998) <sup>c</sup> |
| pEX18Gm- <i>gtrA</i> -UD    | Gene replacement vector for <i>gtrA</i>                                                    | This study                                           |
| pEX18Gm- <i>gtrB</i> -UD    | Gene replacement vector for <i>gtrB</i>                                                    | This study                                           |
| pEX18Gm- <i>gtrII</i> -UD   | Gene replacement vector for <i>gtrII</i>                                                   | This study                                           |
| pEX18Gm- <i>gtrAB</i> -UD   | Gene replacement vector for <i>gtrAB</i>                                                   | This study                                           |
| pEX18Gm- <i>gtrABII</i> -UD | Gene replacement vector for <i>gtrABII</i>                                                 | This study                                           |
| pBBR1-MCS2                  | Mobilizable broad-host-range cloning vector, Km <sup>r</sup>                               | (Kovach, Elzer et al. 1995) <sup>d</sup>             |
| pBBR2- <i>gtrA</i>          | Cloning vector for <i>gtrA</i>                                                             | This study                                           |
| pBBR2- <i>gtrB</i>          | Cloning vector for <i>gtrB</i>                                                             | This study                                           |
| pBBR2- <i>gtrII</i>         | Cloning vector for <i>gtrII</i>                                                            | This study                                           |
| pBBR2- <i>gtrABII</i>       | Cloning vector for <i>gtrABII</i>                                                          | This study                                           |

<sup>a</sup> Cm, chloramphenicol, Gm, gentamicin, Km, kanamycin; <sup>b</sup> Bio-Technology 1(9): 784-791; <sup>c</sup> Gene 212(1): 77-86; <sup>d</sup> Gene 166(1): 175-176.

**Table S4.** Oligonucleotide primers used in this study

| Primer              | Sequence (5'-3') <sup>a</sup> | Description                   |
|---------------------|-------------------------------|-------------------------------|
| <i>aacA</i> -up-1   | CGGGATCCAGACCACTGCCTGAAACC    | Construction of $\Delta aacA$ |
| <i>aacA</i> -up-2   | GGAATTCACCAACAACCTGACCCT      | Construction of $\Delta aacA$ |
| <i>aacA</i> -down-1 | GGAATTCATATCCAGGACCAGCAGT     | Construction of $\Delta aacA$ |
| <i>aacA</i> -down-2 | GCTCTAGATGGTTGTCTTCGGTCAGG    | Construction of $\Delta aacA$ |
| <i>aacA</i> -M-1    | GGCTTGGCTTTGACTTG             | Verification of $\Delta aacA$ |

| Primer                  | Sequence (5'-3') <sup>a</sup> | Description                       |
|-------------------------|-------------------------------|-----------------------------------|
| <i>aacA</i> -M-2        | CGAACGGTCGCAGGTA              | Verification of $\Delta aacA$     |
| <i>algI</i> -up-1       | CGGGATCCCCCTTGACCGTCTTGT      | Construction of $\Delta algI$     |
| <i>algI</i> -up-2       | CCCAAGCTTCGGCGCATTTCGTT       | Construction of $\Delta algI$     |
| <i>algI</i> -down-1     | CCCAAGCTTCCACCAGGCATAGA       | Construction of $\Delta algI$     |
| <i>algI</i> -down-2     | GCTCTAGAGGCAAACGCTTTCACG      | Construction of $\Delta algI$     |
| <i>algI</i> -M-1        | GCTTCCACCGAAACACTG            | Verification of $\Delta algI$     |
| <i>algI</i> -M-2        | GCACGAGAACGACCACA             | Verification of $\Delta algI$     |
| <i>bauA/fes</i> -up-1   | GCTCTAGAGCGGTTGGTGGTCGTTT     | Construction of $\Delta bauA/fes$ |
| <i>bauA/fes</i> -up-2   | GGAATTCGGCGACCAAGCCAGTGTT     | Construction of $\Delta bauA/fes$ |
| <i>bauA/fes</i> -down-1 | GGAATTCGGGCAAGAAGGTGAAGAGC    | Construction of $\Delta bauA/fes$ |
| <i>bauA/fes</i> -down-2 | CGGGATCCACCGGAGATGGAGAACG     | Construction of $\Delta bauA/fes$ |
| <i>bauA/fes</i> -M-1    | ACGGCTCGCAGGTGTTG             | Verification of $\Delta bauA/fes$ |
| <i>bauA/fes</i> -M-2    | TGGTGTACCGCTTTGACG            | Verification of $\Delta bauA/fes$ |
| <i>comE1</i> -up-1      | ACGCGTCGACGGTCAGGCTCAGGA      | Construction of $\Delta comE1$    |
| <i>comE1</i> -up-2      | GCTCTAGACAAGGCACTGCTGGA       | Construction of $\Delta comE1$    |
| <i>comE1</i> -down-1    | GCTCTAGAGATGTCGTAAGGGAT       | Construction of $\Delta comE1$    |
| <i>comE1</i> -down-2    | CGGGATCCTGAAAGATGGGCTGAC      | Construction of $\Delta comE1$    |



| Primer                               | Sequence (5'-3') <sup>a</sup> | Description                                   |
|--------------------------------------|-------------------------------|-----------------------------------------------|
| <i>comE1</i> -M-1                    | GCAGTGACGGAATGG               | Verification of $\Delta comE1$                |
| <i>comE1</i> -M-2                    | GAGAATGAAGTAGAGTGGC           | Verification of $\Delta comE1$                |
| <i>dhrs7B/aidB/ratA/patA</i> -up-1   | CGGGATCCGCAGATGTGCCGCTACG     | Construction of $\Delta dhrs7B/aidB/ratA/pat$ |
| <i>dhrs7B/aidB/ratA/patA</i> -up-2   | GGAATTCAGTTGCTCGCTGACCTT      | Construction of $\Delta dhrs7B/aidB/ratA/pat$ |
| <i>dhrs7B/aidB/ratA/patA</i> -down-1 | GGAATTCGGTCAGCCTGCCATTGTAC    | Construction of $\Delta dhrs7B/aidB/ratA/pat$ |
| <i>dhrs7B/aidB/ratA/patA</i> -down-2 | GCTCTAGAACGCCTGGAAACCCTGT     | Construction of $\Delta dhrs7B/aidB/ratA/pat$ |
| <i>dhrs7B/aidB/ratA/patA</i> -M-1    | CACCCACCCTTGCGACTA            | Verification of $\Delta dhrs7B/aidB/ratA/pat$ |
| <i>dhrs7B/aidB/ratA/patA</i> -M-2    | TTGAAAGCCTGCTGATGC            | Verification of $\Delta dhrs7B/aidB/ratA/pat$ |
| <i>emrBA/mdtP</i> -up-1              | GCTCTAGAGGCTTCCAGCACCA        | Construction of $\Delta emrBA/mdtP$           |
| <i>emrBA/mdtP</i> -up-2              | GGAATTCGACGCCGTTGACCAC        | Construction of $\Delta emrBA/mdtP$           |
| <i>emrBA/mdtP</i> -down-1            | GGAATTCATGCCAGCAGCAGACAGA     | Construction of $\Delta emrBA/mdtP$           |
| <i>emrBA/mdtP</i> -down-2            | CGGGATCCACCACGCCGACAAAGG      | Construction of $\Delta emrBA/mdtP$           |
| <i>emrBA/mdtP</i> -M-1               | TCGAGACAGTGGGTGGG             | Verification of $\Delta emrBA/mdtP$           |
| <i>emrBA/mdtP</i> -M-2               | CAGCGGTAGCGGAAA               | Verification of $\Delta emrBA/mdtP$           |
| <i>fecRI</i> -up-1                   | CGGATCCAACAGCTTGAGGCGGTAA     | Construction of $\Delta fecRI$                |
| <i>fecRI</i> -up-2                   | GGAATTCATCGTGCGGGCAGTT        | Construction of $\Delta fecRI$                |
| <i>fecRI</i> -down-1                 | GGAATTCAGCGAGCGTACCTTG        | Construction of $\Delta fecRI$                |

| Primer                        | Sequence (5'-3') <sup>a</sup>   | Description                             |
|-------------------------------|---------------------------------|-----------------------------------------|
| <i>fecRI</i> -down-2          | GCTCTAGACCACATAGCCCTGAACC       | Construction of $\Delta fecRI$          |
| <i>fecRI</i> -M-1             | GCGGCGATGTCAGTTGG               | Verification of $\Delta fecRI$          |
| <i>fecRI</i> -M-2             | CGAGGTGTCGGTCTTGCTC             | Verification of $\Delta fecRI$          |
| <i>fimA/ecpD/fimD</i> -up-1   | GCTCTAGAGGATAAGTGGGCTGAAAC      | Construction of $\Delta fimA/ecpD/fimD$ |
| <i>fimA/ecpD/fimD</i> -up-2   | GGAATTCTGGGCATGGAGACTGATA       | Construction of $\Delta fimA/ecpD/fimD$ |
| <i>fimA/ecpD/fimD</i> -down-1 | GGAATTCTCGGACAAGGCAGCCAACT      | Construction of $\Delta fimA/ecpD/fimD$ |
| <i>fimA/ecpD/fimD</i> -down-2 | GCTCTAGATGCCCACGGCGTCAAA        | Construction of $\Delta fimA/ecpD/fimD$ |
| <i>fimA/ecpD/fimD</i> -M-1    | CAACTGGGCGATGTAATGC             | Verification of $\Delta fimA/ecpD/fimD$ |
| <i>fimA/ecpD/fimD</i> -M-2    | TGCTGGCGTCGGTGATG               | Verification of $\Delta fimA/ecpD/fimD$ |
| <i>fprA/fecR</i> -up-1        | CGGGATCCACCGCCATCACATAGAACG     | Construction of $\Delta fprA/fecR$      |
| <i>fprA/fecR</i> -up-2        | GGAATTCTGCAACGGCAACAACCTG       | Construction of $\Delta fprA/fecR$      |
| <i>fprA/fecR</i> -down-1      | GGAATTCTCGGCTTCGCTACGCT         | Construction of $\Delta fprA/fecR$      |
| <i>fprA/fecR</i> -down-2      | GCTCTAGATGCTGATTCTGGAGACCCT     | Construction of $\Delta fprA/fecR$      |
| <i>fprA/fecR</i> -M-1         | CGCTGAGCATTGCCACGAA             | Verification of $\Delta fprA/fecR$      |
| <i>fprA/fecR</i> -M-2         | TACGCATCCTCGCCTCCTCC            | Verification of $\Delta fprA/fecR$      |
| <i>hasRS</i> -up-1            | CGGGATCCGCACCGTGGGTCGCATACT     | Construction of $\Delta hasRS$          |
| <i>hasRS</i> -up-2            | CCCAAGCTTCCCACAACACTACTCCTACCTC | Construction of $\Delta hasRS$          |

| Primer                      | Sequence (5'-3') <sup>a</sup>          | Description                                  |
|-----------------------------|----------------------------------------|----------------------------------------------|
| <i>hasRS</i> -down-1        | CCC <u>AAGCTT</u> AAGCGAGCCAAGACGG     | Construction of $\Delta$ <i>hasRS</i>        |
| <i>hasRS</i> -down-2        | GCT <u>CTAGAC</u> GCCACTGAACAGCACAT    | Construction of $\Delta$ <i>hasRS</i>        |
| <i>hasRS</i> -M-1           | GAGCGGGTTGCTTTCAT                      | Verification of $\Delta$ <i>hasRS</i>        |
| <i>hasRS</i> -M-2           | CCATCCACAGGGAGTTCG                     | Verification of $\Delta$ <i>hasRS</i>        |
| <i>hemN/hemN</i> -up-1      | GCT <u>CTAGA</u> AGCACATCCGCAAACAG     | Construction of $\Delta$ <i>hemN/hemN</i>    |
| <i>hemN/hemN</i> -up-2      | G <u>GAAATTC</u> CAGGCAGTGCAGATAGCG    | Construction of $\Delta$ <i>hemN/hemN</i>    |
| <i>hemN/hemN</i> -down-1    | G <u>GAAATTC</u> TGGCATCCGCTTCAACG     | Construction of $\Delta$ <i>hemN/hemN</i>    |
| <i>hemN/hemN</i> -down-2    | CG <u>GATCCT</u> CTCGACGACTTCTCCTTCT   | Construction of $\Delta$ <i>hemN/hemN</i>    |
| <i>hemN/hemN</i> -M-1       | CTGCGGGAAGATGAACC                      | Verification of $\Delta$ <i>hemN/hemN</i>    |
| <i>hemN/hemN</i> -M-2       | CCAGTACGACCTGCACAAC                    | Verification of $\Delta$ <i>hemN/hemN</i>    |
| <i>hurR/hmuVUTS</i> -up-1   | GCT <u>CTAGAG</u> GACCTGTTCAAGCATTTCG  | Construction of $\Delta$ <i>hurR/hmuVUTS</i> |
| <i>hurR/hmuVUTS</i> -up-2   | G <u>GAAATTC</u> CGGTGAGCCATTGTGC      | Construction of $\Delta$ <i>hurR/hmuVUTS</i> |
| <i>hurR/hmuVUTS</i> -down-1 | G <u>GAAATTC</u> CTAAGGCTGTAGACACCCACC | Construction of $\Delta$ <i>hurR/hmuVUTS</i> |
| <i>hurR/hmuVUTS</i> -down-2 | CGC <u>GATCCCC</u> CGGTGAATGAAG        | Construction of $\Delta$ <i>hurR/hmuVUTS</i> |
| <i>hurR/hmuVUTS</i> -M-1    | GCACCGTCATCACCCA                       | Verification of $\Delta$ <i>hurR/hmuVUTS</i> |
| <i>hurR/hmuVUTS</i> -M-2    | GACCTCGTTCGGCTTC                       | Verification of $\Delta$ <i>hurR/hmuVUTS</i> |
| <i>irgA</i> -up-1           | CG <u>GATCCT</u> CCTGACGGCGGTAGTGA     | Construction of $\Delta$ <i>irgA</i>         |

| Primer                        | Sequence (5'-3') <sup>a</sup> | Description                             |
|-------------------------------|-------------------------------|-----------------------------------------|
| <i>irgA</i> -up-2             | GGAATTCTCACGGTAGGACTTGTT      | Construction of $\Delta irgA$           |
| <i>irgA</i> -down-1           | GGAATTCCTATCGGGTGACCAAG       | Construction of $\Delta irgA$           |
| <i>irgA</i> -down-2           | GCTCTAGAATCGCAAACAGCAACC      | Construction of $\Delta irgA$           |
| <i>irgA</i> -M-1              | TGCCGACACCGAGGAT              | Verification of $\Delta irgA$           |
| <i>irgA</i> -M-2              | GGAAGTGGAAGCGATAGAAG          | Verification of $\Delta irgA$           |
| <i>lhgO</i> -up-1             | GCTCTAGAGGCGTGCTCGTAGGAGGTCA  | Construction of $\Delta lhgO$           |
| <i>lhgO</i> -up-2             | GGAATTCCTGTTCGCCGAGACCC       | Construction of $\Delta lhgO$           |
| <i>lhgO</i> -down-1           | GGAATTCACGCCGCTGTTATGC        | Construction of $\Delta lhgO$           |
| <i>lhgO</i> -down-2           | CGGGATCCGATTACTTCGTTCGCCTT    | Construction of $\Delta lhgO$           |
| <i>lhgO</i> -M-1              | GCCTTTGAGGTCGTTCC             | Verification of $\Delta lhgO$           |
| <i>lhgO</i> -M-2              | GCACGGTATTCCGCTTT             | Verification of $\Delta lhgO$           |
| <i>mymA/mbtJ/alkK</i> -up-1   | GCTCTAGATCCGATAAGGCGACCCA     | Construction of $\Delta mymA/mbtJ/alkK$ |
| <i>mymA/mbtJ/alkK</i> -up-2   | GGAATTCGCCAGCAACAAGCACTC      | Construction of $\Delta mymA/mbtJ/alkK$ |
| <i>mymA/mbtJ/alkK</i> -down-1 | GGAATTCGCGAGATTGCGGTTGG       | Construction of $\Delta mymA/mbtJ/alkK$ |
| <i>mymA/mbtJ/alkK</i> -down-2 | CGGGATCCGGCAGATGAGCGGTTGT     | Construction of $\Delta mymA/mbtJ/alkK$ |
| <i>mymA/mbtJ/alkK</i> -M-1    | CAGGGCGTGCAACAGAG             | Verification of $\Delta mymA/mbtJ/alkK$ |
| <i>mymA/mbtJ/alkK</i> -M-2    | CATTGAGCGACGACCAGAT           | Verification of $\Delta mymA/mbtJ/alkK$ |

| Primer                   | Sequence (5'-3') <sup>a</sup> | Description                        |
|--------------------------|-------------------------------|------------------------------------|
| <i>prhIR</i> -up-1       | GCTCTAGATCTGCTGGCGGGTCAT      | Construction of $\Delta prhIR$     |
| <i>prhIR</i> -up-2       | CCCAAGCTTCGGTCAAGGTCGATCAATA  | Construction of $\Delta prhIR$     |
| <i>prhIR</i> -down-1     | CCCAAGCTTGCAGGGCCGACAAACGT    | Construction of $\Delta prhIR$     |
| <i>prhIR</i> -down-2     | CGGGATCCGAACGTCTGGTGGGTCAA    | Construction of $\Delta prhIR$     |
| <i>prhIR</i> -M-1        | TCCTCGTCCGCCACAA              | Verification of $\Delta prhIR$     |
| <i>prhIR</i> -M-2        | GACAGCAACGCAAACATCA           | Verification of $\Delta prhIR$     |
| <i>rpoE/fecR</i> -up-1   | CGGGATCCAGGAGCCACTGTCTTCGG    | Construction of $\Delta rpoE/fecR$ |
| <i>rpoE/fecR</i> -up-2   | GGAATTCCTTCGATGCCAAGGCTCT     | Construction of $\Delta rpoE/fecR$ |
| <i>rpoE/fecR</i> -down-1 | GGAATTCAGCAGGAGGAGGCACTT      | Construction of $\Delta rpoE/fecR$ |
| <i>rpoE/fecR</i> -down-2 | GCTCTAGAGGCGTCCTGGATGATTT     | Construction of $\Delta rpoE/fecR$ |
| <i>rpoE/fecR</i> -M-1    | TGGCGTTGTCGTTGAGTG            | Verification of $\Delta rpoE/fecR$ |
| <i>rpoE/fecR</i> -M-2    | ATCCCTGTCCGTTGTCTGT           | Verification of $\Delta rpoE/fecR$ |
| <i>tadCBA</i> -up-1      | GCTCTAGAGGTGATGAATGCCAAGGG    | Construction of $\Delta tadCBA$    |
| <i>tadCBA</i> -up-2      | CCCAAGCTTTTCTCCCGCCAGTCGGTCTC | Construction of $\Delta tadCBA$    |
| <i>tadCBA</i> -down-1    | CCCAAGCTTGGTATCCGAGGAAATG     | Construction of $\Delta tadCBA$    |
| <i>tadCBA</i> -down-2    | GGAATTCGCTTGCCCTCCTCTGCTT     | Construction of $\Delta tadCBA$    |
| <i>tadCBA</i> -M-1       | AGAGCGACCGCCATTG              | Verification of $\Delta tadCBA$    |

| Primer                                                   | Sequence (5'-3') <sup>a</sup> | Description                                                         |
|----------------------------------------------------------|-------------------------------|---------------------------------------------------------------------|
| <i>tadCBA</i> -M-2                                       | GGCAGAGGCCCTTGT               | Verification of $\Delta tadCBA$                                     |
| <i>wzzB/rfbC/gnaT/</i><br><i>fdtB/wzxE/asnB</i> -up-1    | GCTCTAGATCTCGCTGTCAAACCTCC    | Construction of $\Delta wzzB/rfbC/gnaT/$<br><i>fdtB/wzxE/asnB</i> - |
| <i>wzzB/rfbC/gnaT/</i><br><i>fdtB/wzxE/asnB</i> -up-2    | GGAATTCAGCGGCGATTGGAG         | Construction of $\Delta wzzB/rfbC/gnaT/$<br><i>fdtB/wzxE/asnB</i>   |
| <i>wzzB/rfbC/gnaT/</i><br><i>fdtB/wzxE/asnB</i> -down-1  | GGAATTCGAGGGAAGGTAGTGCG       | Construction of $\Delta wzzB/rfbC/gnaT/$<br><i>fdtB/wzxE/asnB</i>   |
| <i>wzzB/rfbC/gnaT/</i><br><i>fdtB/wzxE/asnBB</i> -down-2 | CGGGATCCTGGCGTTCTACTTCACTC    | Construction of $\Delta wzzB/rfbC/gnaT/$<br><i>fdtB/wzxE/asnB</i>   |
| <i>wzzB/rfbC/gnaT/</i><br><i>fdtB/wzxE/asnB</i> -M-1     | TCGCCAAGTCTGCC                | Verification of $\Delta wzzB/rfbC/gnaT/$<br><i>fdtB/wzxE/asnB</i>   |
| <i>wzzB/rfbC/gnaT/</i><br><i>fdtB/wzxE/asnB</i> -M-2     | CCGCCGTGATGTTT                | Verification of $\Delta wzzB/rfbC/gnaT/$<br><i>fdtB/wzxE/asnB</i>   |
| <i>gtrA</i> -up-1                                        | CGGGATCCCGGCGAGAAATAC         | Construction of $\Delta gtrA$                                       |
| <i>gtrA</i> -up-2                                        | GGAATTCGATCACGGCATAGGT        | Construction of $\Delta gtrA$                                       |
| <i>gtrA</i> -down-1                                      | CGGAATTCCTGACCTGCGGCTT        | Construction of $\Delta gtrA$                                       |
| <i>gtrA</i> -down-2                                      | GCTCTAGACCTTGCACCATTGCTCGA    | Construction of $\Delta gtrA$                                       |
| <i>gtrA</i> -M-1                                         | GCCCGTTGCCCGTAAA              | Verification of $\Delta gtrA$                                       |
| <i>gtrA</i> -M-2                                         | GTCTTGATTACGTCCACCACC         | Verification of $\Delta gtrA$                                       |
| <i>gtrB</i> -up-1                                        | GCTCTAGACAGCGGGCTCTTGAA       | Construction of $\Delta gtrB$                                       |
| <i>gtrB</i> -up-2                                        | GGAATTCACGATCAGTGAAACCT       | Construction of $\Delta gtrB$                                       |

| Primer               | Sequence (5'-3') <sup>a</sup>         | Description                      |
|----------------------|---------------------------------------|----------------------------------|
| <i>gtrB</i> -down-1  | <u>GGAATTC</u> ACGACCTATCGAAAGGAGACC  | Construction of $\Delta gtrB$    |
| <i>gtrB</i> -down-2  | CGGGATCCCAGTTGGTAAGCGGTA              | Construction of $\Delta gtrB$    |
| <i>gtrB</i> -M-1     | GCCCATTTCCTCAACCAG                    | Verification of $\Delta gtrB$    |
| <i>gtrB</i> -M-2     | TGATAGCCGCCCTTGC                      | Verification of $\Delta gtrB$    |
| <i>gtrII</i> -up-1   | <u>GGAATTC</u> GCTTGGCGGCTATGGA       | Construction of $\Delta gtrII$   |
| <i>gtrII</i> -up-2   | CCC <u>AAGCTT</u> CATCCACATAGGCATAATC | Construction of $\Delta gtrII$   |
| <i>gtrII</i> -down-1 | CCC <u>AAGCTT</u> GCGGTGAGCATTCGGTCT  | Construction of $\Delta gtrII$   |
| <i>gtrII</i> -down-2 | GCTCTAGAAACTTCCACCACAACACCCTC         | Construction of $\Delta gtrII$   |
| <i>gtrII</i> -M-1    | GCAAGGTGGTGGACGTAATC                  | Verification of $\Delta gtrII$   |
| <i>gtrII</i> -M-2    | GCAGTTCGTCGCCCAGTT                    | Verification of $\Delta gtrII$   |
| <i>gtrAB</i> -up-1   | CGGGATCCAGGTTGGGTTTGAAGCG             | Construction of $\Delta gtrAB$   |
| <i>gtrAB</i> -up-2   | <u>GGAATTC</u> CGACGAAGGTGTAGAGGG     | Construction of $\Delta gtrAB$   |
| <i>gtrAB</i> -down-1 | <u>GGAATTC</u> ACCTCGTTCAGCACCTT      | Construction of $\Delta gtrAB$   |
| <i>gtrAB</i> -down-2 | GCTCTAGAAAGGGCAGCGGAAA                | Construction of $\Delta gtrAB$   |
| <i>gtrAB</i> -M-1    | AGCGGTAGCGGGTCCAT                     | Verification of $\Delta gtrAB$   |
| <i>gtrAB</i> -M-2    | GGTCAGGTTGCCGAGGA                     | Verification of $\Delta gtrAB$   |
| <i>gtrABII</i> -up-1 | <u>GGAATTC</u> GCACCACATACAGCACCCA    | Construction of $\Delta gtrABII$ |

| Primer                     | Sequence (5'-3') <sup>a</sup>                | Description                             |
|----------------------------|----------------------------------------------|-----------------------------------------|
| <i>gtrABII</i> -up-2       | CCC <u>AAGCTT</u> ACGACGAAGGTGTAGAGG         | Construction of $\Delta$ <i>gtrABII</i> |
| <i>gtrABII</i> -down-1     | CCC <u>AAGCTT</u> GCGGTGAGCATTCGGTCT         | Construction of $\Delta$ <i>gtrABII</i> |
| <i>gtrABII</i> -down-2     | GCT <u>CTAGAA</u> ACTTCCACCACAACACCCTC       | Construction of $\Delta$ <i>gtrABII</i> |
| <i>gtrABII</i> -M-1        | TCAGGTTGGGTTTGAAGCG                          | Verification of $\Delta$ <i>gtrABII</i> |
| <i>gtrABII</i> -M-2        | CTGCATCCAGTCGCAAAGC                          | Verification of $\Delta$ <i>gtrABII</i> |
| <i>gtrA</i> -up/EcoR       | CGG <u>GATCC</u> AGACGAATTTTCGGCTTAC         | Amplification of <i>gtrA</i>            |
| <i>gtrA</i> -down/XbaF     | GCT <u>CTAGAT</u> TGAACACTGGCACGAT           | Amplification of <i>gtrA</i>            |
| <i>gtrB</i> -up/EcoR       | CGG <u>GATCC</u> CCTGACCTGCGGCTTCT           | Amplification of <i>gtrB</i>            |
| <i>gtrB</i> -down/XbaF     | GCT <u>CTAGAC</u> CACGTGGCTCTGACTTAA         | Amplification of <i>gtrB</i>            |
| <i>gtrII</i> -up/EcoR      | GGA <u>ATTCT</u> CGGCATCGGCATAT              | Amplification of <i>gtrII</i>           |
| <i>gtrII</i> -down/XbaF    | CGG <u>GATCC</u> CAGTTTCGAGCCACAGG           | Amplification of <i>gtrII</i>           |
| <i>gtrABII</i> -up/EcoR    | GGA <u>ATTCT</u> GCTTACGTGGCCTGCTTGG         | Amplification of <i>gtrABII</i>         |
| <i>gtrABII</i> -down/XbaF  | CGG <u>GATCC</u> CGGGCGGACAGTTTCGA           | Amplification of <i>gtrABII</i>         |
| <i>gtrII</i> (E47A)-up-1   | CGGGA <u>ATTCT</u> GCTTGGCGGCTATGGA          | Construction of <i>gtrII</i> (E47A)     |
| <i>gtrII</i> (E47A)-up-2   | CAGCGCCCGGTACAGACCCGCAAGCAAGA<br>TCCTGCCTTGG | Construction of <i>gtrII</i> (E47A)     |
| <i>gtrII</i> (E47A)-down-1 | CCAAGGCAGGATCTTGCTTGCGGGTCTGTA<br>CCGGGCGCTG | Construction of <i>gtrII</i> (E47A)     |
| <i>gtrII</i> (E47A)-down-2 | CGG <u>GATCC</u> GGACCGCAACCTTGTCTTTT        | Construction of <i>gtrII</i> (E47A)     |



| Primer                      | Sequence (5'-3') <sup>a</sup>                | Description                          |
|-----------------------------|----------------------------------------------|--------------------------------------|
| <i>gtrII</i> (E47A)-up-1    | GCT <u>CTAGA</u> ATCACGAGTTGTTTGGGCGGG       | Construction of <i>gtrII</i> (F430A) |
| <i>gtrII</i> (F430A)-up-2   | GATCCCCAAGCGCGGGAAAGCCTGAGCGT<br>GCAACACTGAG | Construction of <i>gtrII</i> (F430A) |
| <i>gtrII</i> (F430A)-down-1 | CTCAGTGTTGCACGCTCAGGCTTTCCCGCG<br>CTTGGGGATC | Construction of <i>gtrII</i> (F430A) |
| <i>gtrII</i> (F430A)-down-2 | CGG <u>GATCC</u> CGCAACTGGAAGCCAAGCA         | Construction of <i>gtrII</i> (F430A) |
| <i>gtrII</i> (F431A)-up-2   | CTCAGTGTTGCACGCTCAGTTTGCCCCGCG<br>CTTGGGGATC | Construction of <i>gtrII</i> (F431A) |
| <i>gtrII</i> (F431A)-down-1 | GATCCCCAAGCGCGGGGCAAACTGAGCGT<br>GCAACACTGAG | Construction of <i>gtrII</i> (F431A) |
| <i>gtrII</i> (K480A)-up-2   | TCATCTTCCTGTATGGGCGCCATGACAATG<br>AAGCCCTGCG | Construction of <i>gtrII</i> (K480A) |
| <i>gtrII</i> (K480A)-down-1 | CGCAGGGCTTCATTGTCATGGCGCCCATAC<br>AGGAAGATGA | Construction of <i>gtrII</i> (K480A) |

<sup>a</sup> Restriction sites are underlined.
